# Supplementary material for: Identification and Partial Characterization of an L-Tyrosine Aminotransferase (TAT) fromArabidopsis thaliana
Source: Hindawi journal article supplement (doi:10.1155/2010/549572), 2010-01-01
Supplement: f1 [file 549572.f1.pdf]

## Supplementary Material

**Figure. 1** Physical properties of At5g36160 effects of temperature and pH on enzyme activity. The transamination reaction was carried out using the forward assay using L-Tyrosine (10 mM) as the amino donor and 2-ketoglutarate (10 mM) as the amino acceptor by measuring the production of 4-hydroxyphenylpyruvate at 320 nm.

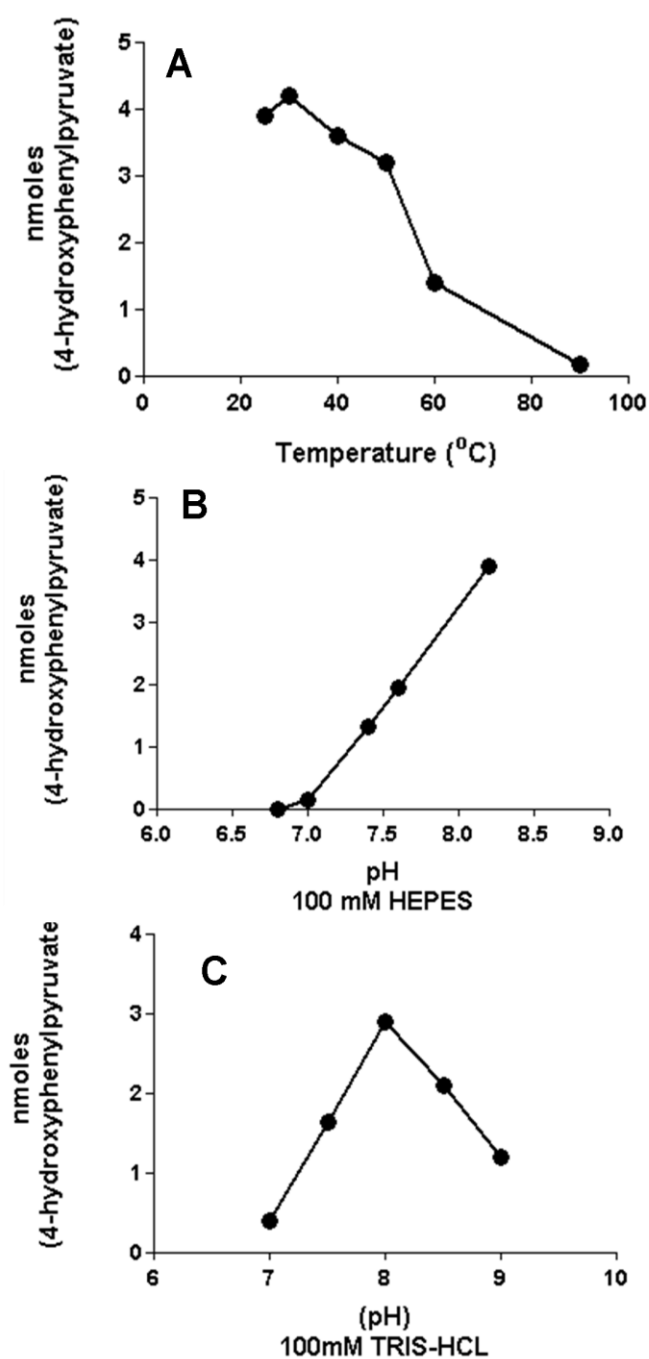

**Figure. 2**

**At5g36160  $K_m$  Tyrosine**

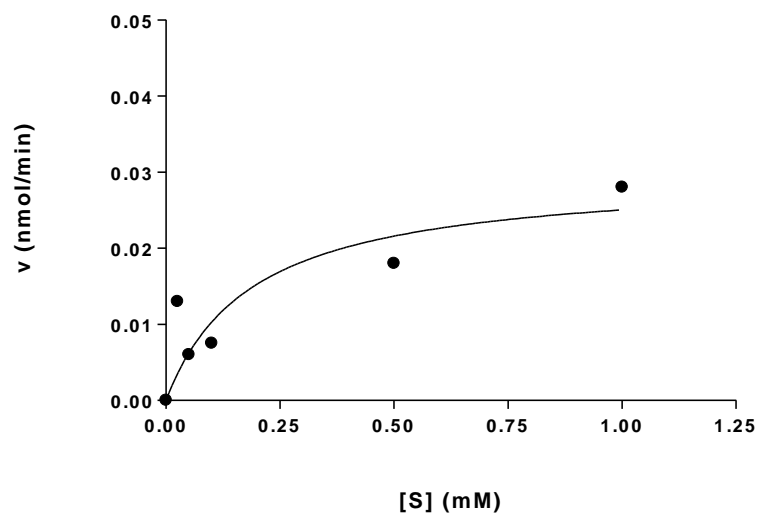

**At5g36160  $K_m$  Phenylalanine**

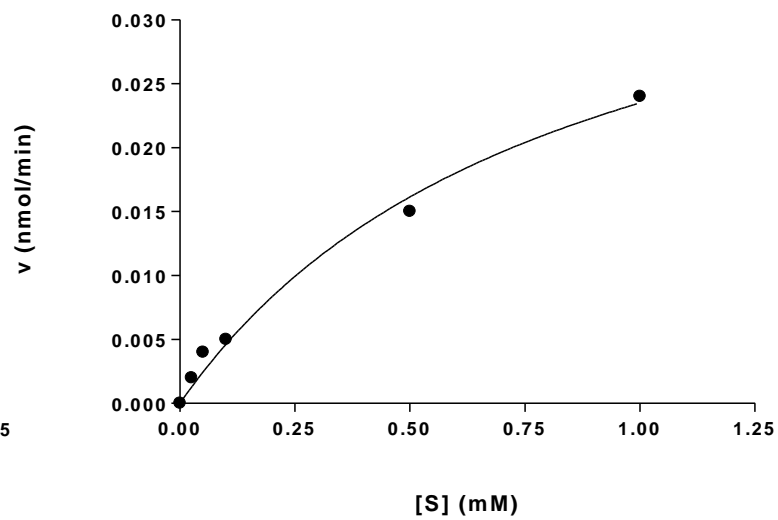

**At5g36160  $K_m$  2-ketoglutarate**

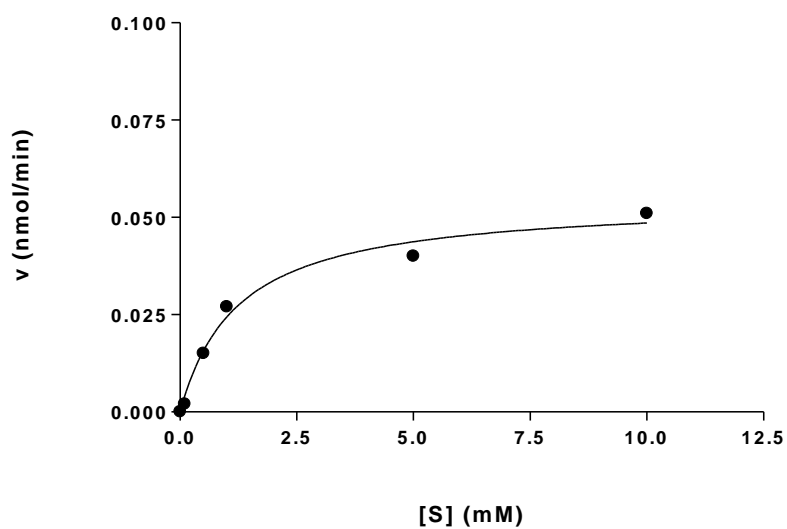

**At5g36160  $K_m$   
4-hydroxyphenylpyruvate**

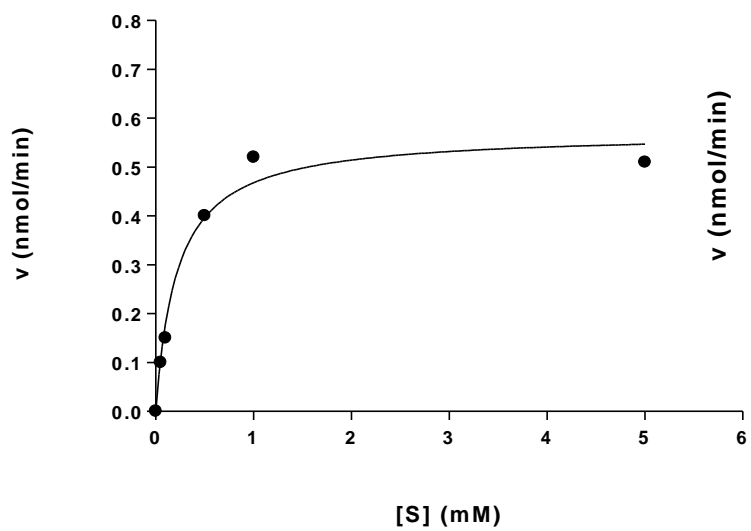

**At5g36160  $K_m$  Phenylpyruvate**

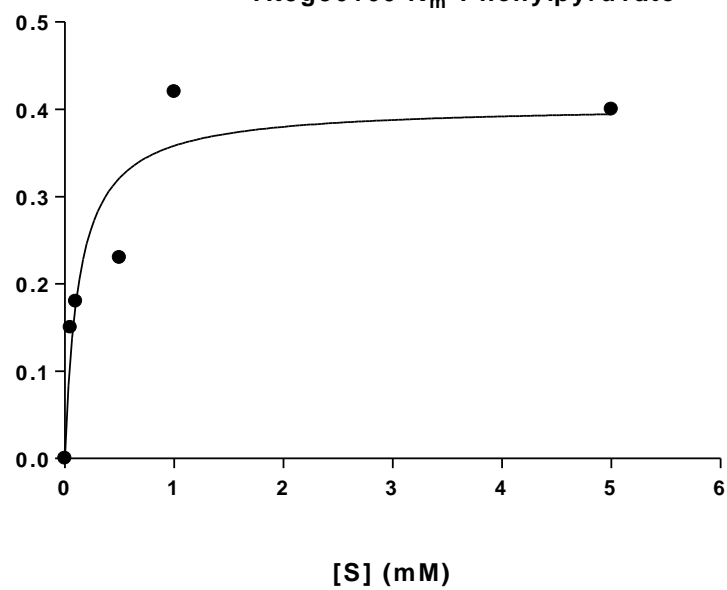

**At5g36160  $K_m$  Glutamate**

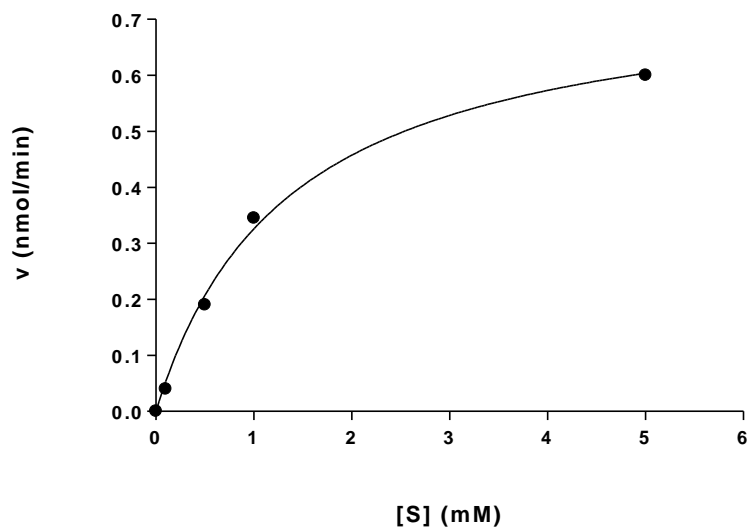

Michaelis-Menten plots of At5g36160. The enzyme assays used to draw the Michaelis-Menten plots are described in the “materials and methods” section.  $V_{\max}$  is represented in nmoles/min, the  $K_m$  of the various substrates is represented in millimolar (mM). The measurements were made under optimal conditions with respect to pH, temperature and substrate concentrations. The kinetic constants were calculated by non-linear regression analysis using the GraphPad Prism Version 3.03 software.

|                                |                                                                                                                                                 |
|--------------------------------|-------------------------------------------------------------------------------------------------------------------------------------------------|
| <b>2-ketoglutarate</b>         | 10µg recombinant enzyme<br>5 mM L-Phenylalanine                                                                                                 |
| <b>L-Tyrosine</b>              | 10µg recombinant enzyme<br>20mM 2-ketoglutarate                                                                                                 |
| <b>L-Phenylalanine</b>         | 10µg recombinant enzyme<br>20mM 2-ketoglutarate                                                                                                 |
| <b>4-hydroxyphenylpyruvate</b> | 20µg recombinant enzyme<br>0.3mM thio-NAD<br>0.3mM Coenzyme A<br>5mM L-Glutamate<br>200µg recombinant 2-ketoglutarate dehydrogenase             |
| <b>Phenylpyruvate</b>          | 20µg recombinant enzyme<br>0.3mM thio-NAD<br>0.3mM Coenzyme A<br>5mM L-Glutamate<br>200µg recombinant 2-ketoglutarate dehydrogenase             |
| <b>L-Glutamate</b>             | 20µg recombinant enzyme<br>0.3mM thio-NAD<br>0.3mM Coenzyme A<br>5mM 4-hydroxyphenylpyruvate<br>200µg recombinant 2-ketoglutarate dehydrogenase |

**Note:** the assays were in 500µl final volume using 100mM HEPES pH (8.2)
